# Supplementary material
Source: ML conference proceedings conference paper supplement (https://proceedings.mlr.press/v38/wang15a.html)
Supplement: Supplementary file [file wang15a-supp.pdf]

---

## Falling Rule Lists (Supplement)

---

**Fulton Wang**  
CSAIL and Sloan, MIT  
fultonw@mit.edu

**Cynthia Rudin**  
CSAIL and Sloan, MIT  
rudin@mit.edu

### Number of Rules Returned by Rule Miner

The nFoil based methods performed relatively poorly in part because the number of rules returned by nFoil was much smaller than the number of rules returned by FPGrowth, thus overly restricting the hypothesis space for such methods. We report in Table 1 the average, over the 5-fold cross validation we performed, of the number of rules mined by nFoil and FPGrowth, for every dataset considered in the paper.

| Rule Miner | Readmissions | Spam | Mamm | Breast | Cars |
|------------|--------------|------|------|--------|------|
| nFoil      | 7            | 24   | 8    | 5      | 25   |
| FPGrowth   | 103          | 550  | 43   | 147    | 190  |

Table 1: Number of rules mined for each dataset.

### Running Times

We also report in Table 2 for each dataset the running times needed to fit a Falling Rule list on the entire dataset, as well as the size and number of features in it.

| Dataset     | n    | p  | running time (sec) |
|-------------|------|----|--------------------|
| Readmission | 7944 | 33 | 35                 |
| Spam        | 4601 | 57 | 102                |
| Mamm        | 961  | 13 | 35                 |
| Breast      | 683  | 26 | 42                 |
| Cars        | 1728 | 21 | 39                 |

Table 2: Running time for each dataset
